# Supplementary material for: Frail Males on the American Frontier: The Role of Environmental Harshness on Sex Ratios at Birth across a Period of Rapid Industrialization
Source: MDPI journal article supplement (doi:10.3390/socsci10090319), 2021-08-24
Supplement: s1 [file s1]

Archive with 1 entries (1 files):
- socsci-1189263-supplementary.pdf
