# Supplementary material for: Frail Males on the American Frontier: The Role of Environmental Harshness on Sex Ratios at Birth across a Period of Rapid Industrialization
Source: MDPI journal article supplement (doi:10.3390/socsci10090319), 2021-08-24
Supplement: s1 [file s1 › socsci-1189263-supplementary.pdf]

**Supplemental Materials for:**

**Frail males on the American frontier: the role of environmental harshness on sex ratios at birth across a period of rapid industrialization**

**SM Table S1. Marginal effects of the relevant GSL measure on sex proportions at birth, by time and space**

| Peak Lake Elevation (in feet) |           |            | River Inflows (in 1,000 acre-feet) |            |            |
|-------------------------------|-----------|------------|------------------------------------|------------|------------|
|                               | Pre-Spike | Post-Spike |                                    | Pre-Spike  | Post-Spike |
| Salt Lake County              | 0.00618*  | 0.00050    | Salt Lake County                   | 0.000003   | 0.000001   |
| Other county                  | -0.00065  | 0.00024    | Other county                       | -0.000006* | 0.00003    |

  

| Precipitation on Lake (in inches) |           |            | Fresh-Water Lake Evaporation (in inches) |            |            |
|-----------------------------------|-----------|------------|------------------------------------------|------------|------------|
|                                   | Pre-Spike | Post-Spike |                                          | Pre-Spike  | Post-Spike |
| Salt Lake County                  | 0.00467*  | 0.00071    | Salt Lake County                         | -0.000046* | -0.000004  |
| Other county                      | 0.00012   | -0.00019   | Other county                             | -0.000002  | -0.000001  |

  

|        |  |  |  |  |  |
|--------|--|--|--|--|--|
| *p<.05 |  |  |  |  |  |
|--------|--|--|--|--|--|

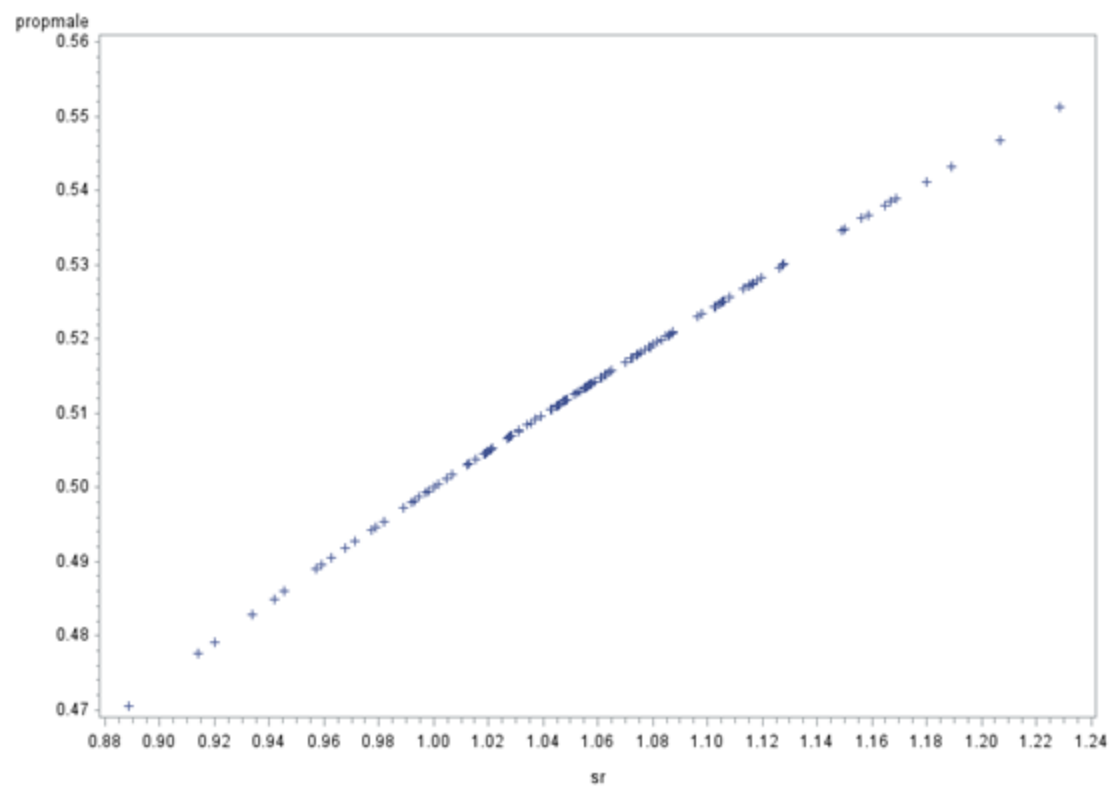

**SM Figure S1.** Sex ratio at birth (sr) by sex proportion (propmale)

**SM Table S2. Marginal effects of the relevant GSL measure on the probability of a birth being male, by time and space**

| Peak Lake Elevation (in feet) |           |            | River Inflows (in 1,000 acre-feet) |           |            |
|-------------------------------|-----------|------------|------------------------------------|-----------|------------|
|                               | Pre-Spike | Post-Spike |                                    | Pre-Spike | Post-Spike |
| Salt Lake County              | 0.02367*  | 0.00160    | Salt Lake County                   | 0.00002   | 0.00001    |
| Other county                  | -0.00225  | -0.00042   | Other county                       | -0.00003* | 0.00001    |

  

| Precipitation on Lake (in inches) |           |            | Fresh-Water Lake Evaporation (in inches) |           |            |
|-----------------------------------|-----------|------------|------------------------------------------|-----------|------------|
|                                   | Pre-Spike | Post-Spike |                                          | Pre-Spike | Post-Spike |
| Salt Lake County                  | 0.01761   | 0.00302    | Salt Lake County                         | -0.00018* | -0.00001   |
| Other county                      | 0.00097   | -0.00052   | Other county                             | -0.00001  | -0.00001   |

  

|        |  |  |  |  |  |
|--------|--|--|--|--|--|
| *p<.05 |  |  |  |  |  |
|--------|--|--|--|--|--|
